# Supplementary material for: Long-Term Impact of COVID-19 on Heart Rate Variability: A Systematic Review of Observational Studies
Source: MDPI journal article supplement (doi:10.3390/healthcare11081095), 2023-04-11
Supplement: s1 [file s1]

**Supplementary S3.** Main findings of included studies.

| Author         | Study type            | Comparison                                                                                                                      | Population (mean age)                           | Assessment time point       | Assessment duration (device)                                                | HRV parameters                                                                                                                                                                                                  | Findings G1 vs. G2 (vs. G3)                                                                                                                                                                                                                                                                                                                                                                                                                                                                                                                                                                                                    |
|----------------|-----------------------|---------------------------------------------------------------------------------------------------------------------------------|-------------------------------------------------|-----------------------------|-----------------------------------------------------------------------------|-----------------------------------------------------------------------------------------------------------------------------------------------------------------------------------------------------------------|--------------------------------------------------------------------------------------------------------------------------------------------------------------------------------------------------------------------------------------------------------------------------------------------------------------------------------------------------------------------------------------------------------------------------------------------------------------------------------------------------------------------------------------------------------------------------------------------------------------------------------|
| Adler 2021     | cross-sectional study | G1: Previous COVID-19 infection (at 3- and 6-months post-discharge) (n = 18)<br>G2: Matched controls (n = 7)                    | G1: 50 ± 16<br>G2: 50 ± 14                      | 3 months (12 weeks) or more | 1-min HRV (unclear) responses to orthostatic stress (3-min active standing) | 1. SDNN (ms); 2. RMSSD (ms); 3. pNN50 (%)                                                                                                                                                                       | Law data was not reported.<br>long COVID vs. controls (p < 0.05)<br>1. SDNN (ms): <<br>2. RMSSD (ms): <<br>3. pNN50 (%): <                                                                                                                                                                                                                                                                                                                                                                                                                                                                                                     |
| Acanfora 2022  | cross-sectional study | G1: Long COVID patients (n = 30)<br>G2: No-COVID-19 patients (n = 20)                                                           | G1: 58.6 ± 17.6<br>G2: 56.3 ± 14.7              | unclear                     | 24-h ECG monitoring (portable twelve-channel tape recorder)                 | 1. SDNN (ms); 2. SDANN (ms); 3. RMSSD (ms); 4. SDNN Index (ms); 5. pNN50 (%); 6. total power (ms <sup>2</sup> ); 7. VLF (ms <sup>2</sup> ); 8. LF (ms <sup>2</sup> ); 9. HF (ms <sup>2</sup> ); 10. LF/HF ratio | 1. 92.3 ± 24.4 vs. 127 ± 36.4 (p = 0.0001)<br>2. 79 ± 21.9 vs. 109.9 ± 36.8 (p = 0.001)<br>3. 24.5 ± 12.3 vs. 33.9 ± 20.9 (p > 0.05)<br>4. 41.9 ± 15.3 vs. 57.6 ± 14.5 (p = 0.001)<br>5. 5.7 ± 7.8 vs. 10.8 ± 11.2 (p > 0.05)<br>6. 7.46 ± 0.5 vs. 8.08 ± 0.6 (p < 0.0001)<br>7. 6.84 ± 0.8 vs. 7.66 ± 0.6 (p < 0.0001)<br>8. 6.55 ± 0.42 vs. 6.44 ± 0.74 (p > 0.05)<br>9. 4.65 ± 0.9 vs. 5.33 ± 0.9 (p = 0.015)<br>10. 1.46 ± 0.27 vs. 1.23 ± 0.13 (p = 0.001)                                                                                                                                                                |
| Aranyó 2022    | cross-sectional study | G1: Long COVID patients with IST (n = 40)<br>G2: Fully recovered COVID-19 patients (n = 19)<br>G3: Uninfected controls (n = 17) | G1: 40.1 ± 10<br>G2: 42.2 ± 11<br>G3: 39.5 ± 13 | 3 months (12 weeks) or more | 24-h ECG monitoring (AFT 1000 + B recorder)                                 | 1. Daytime SD (ms); 2. Daytime pNN50 (%); 3. Nighttime SD (ms); 4. Nighttime pNN50 (%); 5. VLF (Hz); 6. LF (Hz); 7. HF (Hz); 8. LF/HF ratio                                                                     | (p-value: IST vs. recovered, IST vs. uninfected)<br>1. 95.0 ± 25 vs. 121.5 ± 34 vs. 138.1 ± 25 (p = 0.011, p < 0.001)<br>2. 3.2 ± 3 vs. 10.5 ± 8 vs. 17.3 ± 10 (p = 0.001, p < 0.001)<br>3. 101.3 ± 28 vs. 144.5 ± 42 vs. 145.4 ± 39 (p < 0.001, p = 0.003)<br>4. 8.4 ± 8 vs. 16.6 ± 15 vs. 21.4 ± 11 (p = 0.051, p = 0.004)<br>5. 1463.1 ± 538 vs. 2415.7 ± 1361 vs. 3931.1 ± 2194 (p = 0.044, p < 0.001)<br>6. 670.2 ± 380 vs. 1093.2 ± 878 vs. 1801.5 ± 800 (p = 0.092, p < 0.001)<br>7. 246.0 ± 179 vs. 463.7 ± 295 vs. 1048.5 ± 570 (p = 0.060, p < 0.001)<br>8. 3.6 ± 1 vs. 2.7 ± 1.3 vs. 2.0 ± 1 (p = 0.259, p = 0.040) |
| Asarcikli 2022 | cross-sectional study | G1: Previous COVID-19 infection (> 12 weeks) and no current clinical symptoms (n = 60)                                          | G1: 39 (range 31–49)<br>G2: 30 (range 26–42)    | 3 months (12 weeks) or more | 24-h ECG monitoring (DMS300-4A Holter ECG recorder)                         | 1. SDNN (ms); 2. SDANN (ms); 3. RMSSD (ms); 4. SDNN Index (ms); 5. pNN50 (%); 6. total                                                                                                                          | 1. 155 (IQR 144–177) vs. 147 (IQR 126–166) (p = 0.015)<br>2. 154 (IQR 127–166) vs. 135 (IQR 114–154) (p = 0.041)<br>3. 41 (IQR 27–61) vs. 31 (IQR 22–37) (p = 0.002)<br>4. 64 (IQR 54–97) vs. 53 (IQR 47–64) (p = 0.003)<br>5. 14 (IQR 11–18) vs. 9 (IQR 3–16) (p = 0.032)                                                                                                                                                                                                                                                                                                                                                     |

|               |                       |                                                                                                                                                                  |                                        |                             |                                                                                         |                                                                                                                                                                                                                                                       |                                                                                                                                                                                                                                                                                                                                                                                                                                                                                                                                                                                                           |
|---------------|-----------------------|------------------------------------------------------------------------------------------------------------------------------------------------------------------|----------------------------------------|-----------------------------|-----------------------------------------------------------------------------------------|-------------------------------------------------------------------------------------------------------------------------------------------------------------------------------------------------------------------------------------------------------|-----------------------------------------------------------------------------------------------------------------------------------------------------------------------------------------------------------------------------------------------------------------------------------------------------------------------------------------------------------------------------------------------------------------------------------------------------------------------------------------------------------------------------------------------------------------------------------------------------------|
|               |                       | G2: Matched healthy controls (n = 33)                                                                                                                            |                                        |                             |                                                                                         | power (ms <sup>2</sup> ); 7. LF (ms <sup>2</sup> ); 8. HF (ms <sup>2</sup> ); 9. LF/HF ratio; 10. SDNN > 60 ms; 11. RMSSD > 40 ms                                                                                                                     | 6. 3.148 (IQR 2.348–4.408) vs. 2.854 (IQR 2.212–4.195) (p = 0.474)<br>7. 712 (IQR 478–946) vs. 665 (IQR 561–1065) (p = 0.599)<br>8. 325 (IQR 175–540) vs. 148 (IQR 105–544) (p = 0.037)<br>9. 1.99 (IQR 1.29–3.80) vs. 3.53 (IQR 1.97–5.78) (p = 0.010)<br>10. 36 (60.0%) vs. 12 (36.4%) (p = 0.028)<br>11. 31 (51.7%) vs. 7 (21.2%) (p = 0.003)                                                                                                                                                                                                                                                          |
| Freire 2022   | cross-sectional study | G1: Previous COVID-19 infection (at 15-180 days) (n = 20)<br>G2: Matched healthy controls (n = 18)                                                               | G1: 29.17 ± 6.32<br>G2: 26.22 ± 5.22   | 15-180 days                 | 5-min HRV (Polar RS800CX)                                                               | 1. SDNN (ms); 2. RMSSD (ms); 3. pNN50 (%); 4. LF (nu); 5. HF (nu); 6. LF/HF ratio; 7. Triangular index; 8. TINN (ms)                                                                                                                                  | 1. 29.13 ± 9.37 vs. 36.17 ± 9.59 (p = 0.0282)<br>2. 24.45 (IQR 14.40–28.55) vs. 27.40 (IQR 23.40–33.15) (p = 0.0452)<br>3. 3.41 (IQR 0.25–7.36) vs. 6.73 (IQR 3.74–12.50) (p = 0.055)<br>4. 66.61 ± 15.65 vs. 65.49 ± 15.30 (p = 0.825)<br>5. 33.33 ± 15.65 vs. 34.49 ± 15.30 (p = 0.8198)<br>6. 1.83 (IQR 1.11–3.88) vs. 1.99 (IQR 1.47–3.39) (p = 0.9883)<br>7. 7.91 ± 2.34 vs. 9.02 ± 1.91 (p = 0.1218)<br>8. 135 ± 40.77 vs. 135 ± 40.77 (p = 0.0404)                                                                                                                                                 |
| Kurtoğlu 2022 | cross-sectional study | G1: Patients with a confirmed history of COVID-19 (at 20.0 ± 11.4 weeks) (n = 50)<br>G2: Healthy controls without a history of COVID-19 and vaccination (n = 50) | G1: 40.82 ± 10.31<br>G2: 38.24 ± 12.02 | 3 months (12 weeks) or more | 24-h ECG monitoring (iH-12Plus Holter System)                                           | 1. SDNN (ms); 2. SDANN (ms); 3. RMSSD (ms); 4. SDNN Index (ms); 5. pNN50 (%); 6. total power (ms <sup>2</sup> ); 7. VLF (ms <sup>2</sup> ); 8. LF (ms <sup>2</sup> ); 9. HF (ms <sup>2</sup> ); 10. LF (nu); 11. HF (nu); 12. Triangular index (HRVI) | 1. 122.40 ± 30.90 vs. 161.30 ± 30.80 (p < 0.0001)<br>2. 113.90 ± 30.20 vs. 144.70 ± 33.60 (p < 0.0001)<br>3. 1.45 ± 0.16 vs. 1.62 ± 0.18 (p < 0.0001)<br>4. 50.10 ± 13.40 vs. 63.60 ± 14.80 (p < 0.0001)<br>5. 1.03 ± 0.29 vs. 1.23 ± 0.25 (p < 0.0001)<br>6. 3.36 ± 0.24 vs. 3.55 ± 0.21 (p < 0.0001)<br>7. 3.17 ± 0.23 vs. 3.33 ± 0.20 (p = 0.001)<br>8. 2.71 ± 0.31 vs. 2.95 ± 0.28 (p < 0.0001)<br>9. 2.29 ± 0.33 vs. 2.62 ± 0.34 (p < 0.0001)<br>10. 69.60 ± 11.60 vs. 67.80 ± 13.90 (p = 0.482)<br>11. 28.10 ± 11.10 vs. 34.30 ± 16.60 (p = 0.033)<br>12. 17.20 ± 5.05 vs. 20.40 ± 4.95 (p = 0.030) |
| Liu 2021      | cross-sectional study | G1: Discharged COVID-19 patients (n = 186 → 164 analyzed)<br>G2: Matched healthy controls (n = 186 → 166 analyzed)                                               | Not reported                           | unclear                     | more than 10-h recording (ballistocardiography-based internet-of-medical-things system) | 1. SDNN (ms); 2. SDANN (ms); 3. LF (ms <sup>2</sup> ); 4. HF (ms <sup>2</sup> )                                                                                                                                                                       | Law data was not reported.<br>long COVID vs. controls (p < 0.05)<br>1. SDNN (ms): <<br>2. SDANN (ms): <<br>3. LF (ms2): <<br>4. HF (ms2): <                                                                                                                                                                                                                                                                                                                                                                                                                                                               |
| Marques 2022  | cross-sectional study | G1: Long COVID clinical group (n = 155 → 81 analyzed)                                                                                                            | G1: 43.88 ± 10.03<br>G2: 40.69 ± 6.35  | 3 months (12 weeks) or more | 5-min HRV (Polar RS800CX)                                                               | 1. SDNN (ms); 2. RMSSD (ms); 3. LF (nu); 4. HF (nu); 5.                                                                                                                                                                                               | 1. 46.83 ± 133.77 vs. 46.50 ± 29.20 (p < 0.0001)<br>2. 38.25 ± 35.68 vs. 54.90 ± 40.64 (p = 0.000)<br>3. 47.29 ± 18.33 vs. 44.65 ± 20.71 (p = 0.377)<br>4. 52.60 ± 18.33 vs. 55.28 ± 20.69 (p = 0.370)                                                                                                                                                                                                                                                                                                                                                                                                    |

|                           |                       |                                                                                                                                  |                                              |                                       |                                                                                |                                                                                                                                                                          |
|---------------------------|-----------------------|----------------------------------------------------------------------------------------------------------------------------------|----------------------------------------------|---------------------------------------|--------------------------------------------------------------------------------|--------------------------------------------------------------------------------------------------------------------------------------------------------------------------|
|                           |                       | G2: Uninfected controls (n = 94)                                                                                                 |                                              |                                       | LF/HF ratio; 6. SD1 (ms); 7. SD2 (ms)                                          | 5. $4.22 \pm 25.06$ vs. $1.26 \pm 1.42$ (p = 0.235)<br>6. $27.09 \pm 25.27$ vs. $39.89 \pm 28.39$ (p = 0.000)<br>7. $35.93 \pm 23.32$ vs. $51.52 \pm 31.79$ (p < 0.0001) |
| Mekhael 2022; Dagher 2022 | cross-sectional study | G1: Previous COVID-19 infection (at $171 \pm 114$ days) (n = 122)<br>G2: Controls who were not diagnosed with COVID-19 (n = 588) | G1: $41.32 \pm 15.7$<br>G2: $45.99 \pm 14.0$ | $171 \pm 114$ days                    | 5-min HRV (PPG-based smartband)                                                | 1. Mean HRV day/person (ms)<br><br>1. $38.9 \pm 614.4$ vs. $44.0 \pm 619.2$ (p = 0.01)                                                                                   |
| Shah 2022                 | cross-sectional study | G1: Previous COVID-19 infection (recovered within 30-45 days) (n = 92)<br>G2: Healthy volunteer controls (n = 120)               | G1: $50.6 \pm 12.1$<br>G2: $51.8 \pm 4.2$    | unclear (recovered within 30-45 days) | 1-min HRV (VESTA 301i) responses to orthostatic stress (3-min active standing) | 1. RMSSD (ms)<br><br>1. $13.9 \pm 11.8$ vs. $19.9 \pm 19.5$ (p = 0.01)                                                                                                   |
| Zanoli 2022               | cross-sectional study | G1: Previous COVID-19 infection (> 12 weeks) (n = 92)<br>G2: Matched controls (n = 180)                                          | G1: $55 \pm 12$<br>G2: $55 \pm 13$           | 3 months (12 weeks) or more           | 5-min HRV (Finometer Midi device)                                              | 1. LF/HF ratio; 2. Triangular index<br><br>1. 1.19 (IQR 0.65–2.13) vs. 1.22 (IQR 0.72–2.09) (p > 0.05)<br>2. 6.74 (IQR 4.92–8.83) vs. 6.92 (IQR 5.33–8.83) (p > 0.05)    |

**Abbreviations.** COVID-19, Coronavirus disease 2019; ECG, electrocardiogram; G, group; HF, high frequency band; HRV, heart rate variability; IST, inappropriate sinus tachycardia; IQR, interquartile range; LF, low frequency band; pNN50, proportion of the number of pairs of successive normal-to-normal RR intervals that differ by more than 50 milliseconds divided by the total number of normal-to-normal RR intervals; RMSSD, root mean square of the successive differences; SD, standard deviation of the interbeat interval; SDANN, standard deviation of the averages of normal-to-normal RR intervals; SDNN, standard deviation of normal-to-normal RR intervals; SDNN index, mean of the standard deviations of all normal-to-normal RR intervals for all 5 min segments of the entire recording; TINN, triangular interpolation of normal-to-normal RR intervals; VLF, very low frequency band.
